# Supplementary material
Source: PubMed Central journal article supplement (PMC5810871)
Supplement: supplementary_material_948.pdf [file supplementary_material_948.pdf]

Table 5. The Scottish Rural-Urban Classification[14].

| <b>Class</b> | <b>Class Name</b>       | <b>Description</b>                                                                                                                |
|--------------|-------------------------|-----------------------------------------------------------------------------------------------------------------------------------|
| 1            | Large Urban Areas       | Settlements of over 125,000 people.                                                                                               |
| 2            | Other Urban Areas       | Settlements of 10,000 to 124,999 people.                                                                                          |
| 3            | Accessible Small Towns  | Settlements of between 3,000 and 9,999 people, and within a 30 minute drive time of a settlement of 10,000 or more.               |
| 4            | Remote Small Towns      | Settlements of between 3,000 and 9,999 people, and with a drive time between 30 and 60 minutes to a settlement of 10,000 or more. |
| 5            | Very Remote Small Towns | Settlements of between 3,000 and 9,999 people, and with a drive time of over 60 minutes to a settlement of 10,000 or more.        |
| 6            | Accessible Rural Areas  | Areas with a population of less than 3,000 people, and within a drive time of 30 minutes to a settlement of 10,000 or more.       |
| 7            | Remote Rural Areas      | Areas with a population of less than 3,000 people, and with a drive time of 30-60 minutes to a settlement of 10,000 or more.      |
| 8            | Very Remote Rural Areas | Areas with a population of less than 3,000 people, and with a drive time of over 60 minutes to a settlement of 10,000 or more.    |

Table 6. 60 minute accessibility by road ambulance: Population and areal coverage, by health board.

| Healthboard                    | Area  | Population | Intermediate Critical Care |     |            |     | Definitive Critical Care |     |            |     |
|--------------------------------|-------|------------|----------------------------|-----|------------|-----|--------------------------|-----|------------|-----|
|                                |       |            | area                       |     | Population |     | Area                     |     | Population |     |
| Name                           | Km2   | n          | km2                        | %   | n          | %   | km2                      | %   | n          | %   |
| <b>Ayrshire &amp; Arran</b>    | 3369  | 373339     | 3369                       | 100 | 373339     | 100 | 2911                     | 86  | 367223     | 98  |
| <b>Borders</b>                 | 4732  | 113615     | 4621                       | 98  | 113080     | 100 | 4621                     | 98  | 113080     | 100 |
| <b>Dumfries &amp; Galloway</b> | 6426  | 151302     | 6426                       | 100 | 151302     | 100 | 6426                     | 100 | 151302     | 100 |
| <b>Fife</b>                    | 1325  | 367036     | 1325                       | 100 | 367036     | 100 | 1325                     | 100 | 367036     | 100 |
| <b>Forth Valley</b>            | 2643  | 297529     | 2643                       | 100 | 297529     | 100 | 2643                     | 100 | 297529     | 100 |
| <b>GG&amp;C</b>                | 1104  | 1143934    | 1104                       | 100 | 1143934    | 100 | 1104                     | 100 | 1143934    | 100 |
| <b>Grampian</b>                | 8736  | 568800     | 7896                       | 90  | 558283     | 98  | 7544                     | 86  | 545599     | 96  |
| <b>Highland</b>                | 32593 | 320067     | 20139                      | 62  | 276721     | 86  | 9591                     | 29  | 196582     | 61  |
| <b>Lanarkshire</b>             | 2242  | 651635     | 2242                       | 100 | 651635     | 100 | 2242                     | 100 | 651635     | 100 |
| <b>Lothian</b>                 | 1724  | 834461     | 1724                       | 100 | 834461     | 100 | 1724                     | 100 | 834461     | 100 |
| <b>Orkney</b>                  | 990   | 21349      | 457                        | 46  | 16512      | 77  | 0                        | 0   | 0          | 0   |
| <b>Shetland</b>                | 1467  | 23154      | 772                        | 53  | 16440      | 71  | 0                        | 0   | 0          | 0   |
| <b>Tayside</b>                 | 7527  | 409481     | 7510                       | 100 | 409436     | 100 | 6892                     | 92  | 408938     | 99  |
| <b>Western Isles</b>           | 3060  | 28396      | 1459                       | 48  | 19026      | 67  | 0                        | 0   | 0          | 0   |

Table 7. 60 minute accessibility by road ambulance: Population and areal coverage, by Scottish urban/rural classification category.

| Scottish Rural Urban Category |       |            | Intermediate Critical Care |     |            |     | Definitive Critical Care |     |            |     |
|-------------------------------|-------|------------|----------------------------|-----|------------|-----|--------------------------|-----|------------|-----|
|                               | Area  | Population | area                       |     | Population |     | Area                     |     | Population |     |
| Name                          | Km2   | n          | km2                        | %   | n          | %   | km2                      | %   | n          | %   |
| Large urban areas             | 505   | 1792214    | 505                        | 100 | 1792214    | 100 | 505                      | 100 | 1792214    | 100 |
| Other urban areas             | 691   | 1780740    | 691                        | 100 | 1780740    | 100 | 677                      | 98  | 1770623    | 99  |
| Accessible small towns        | 188   | 451419     | 189                        | 100 | 452067     | 100 | 189                      | 100 | 451844     | 100 |
| Remote small towns            | 54    | 105997     | 54                         | 100 | 105997     | 100 | 51                       | 94  | 97253      | 92  |
| Very remote small towns       | 45    | 62959      | 39                         | 86  | 52919      | 84  | 6                        | 14  | 11935      | 19  |
| Accessible rural areas        | 18558 | 748324     | 18469                      | 100 | 745107     | 100 | 17978                    | 97  | 740265     | 99  |
| Remote rural areas            | 17828 | 184698     | 17695                      | 99  | 179979     | 97  | 16537                    | 93  | 167005     | 90  |
| Very remote rural areas       | 40066 | 176503     | 23884                      | 60  | 119135     | 67  | 10322                    | 26  | 36826      | 21  |

Table 8. 60 minute accessibility by helicopter: Population and areal coverage, by health board.

| Healthboard         |       |            | Intermediate Critical Care |     |            |      | Definitive Critical Care |     |            |     |
|---------------------|-------|------------|----------------------------|-----|------------|------|--------------------------|-----|------------|-----|
|                     | Area  | Population | area                       |     | Population |      | Area                     |     | Population |     |
|                     | Km2   | n          | km2                        | %   | n          | %    | km2                      | %   | n          | %   |
| Ayrshire & Arran    | 3369  | 373339     | 3369                       | 100 | 373339     | 100% | 3369                     | 100 | 373339     | 100 |
| Borders             | 4732  | 113615     | 4732                       | 100 | 113615     | 100% | 4732                     | 100 | 113615     | 100 |
| Dumfries & Galloway | 6426  | 151302     | 6426                       | 100 | 151302     | 100% | 6133                     | 95  | 146099     | 97  |
| Fife                | 1325  | 367036     | 1325                       | 100 | 367036     | 100% | 1325                     | 100 | 367036     | 100 |
| Forth Valley        | 2643  | 297529     | 2643                       | 100 | 297529     | 100% | 2643                     | 100 | 297529     | 100 |
| GG&C                | 1104  | 1143934    | 1104                       | 100 | 1143934    | 100% | 1104                     | 100 | 1143934    | 100 |
| Grampian            | 8736  | 568800     | 8736                       | 100 | 568800     | 100% | 8736                     | 100 | 568800     | 100 |
| Highland            | 32593 | 320067     | 28978                      | 89  | 306247     | 96%  | 22117                    | 68  | 255178     | 80  |
| Lanarkshire         | 2242  | 651635     | 2242                       | 100 | 651635     | 100% | 2242                     | 100 | 651635     | 100 |
| Lothian             | 1724  | 834461     | 1724                       | 100 | 834461     | 100% | 1724                     | 100 | 834461     | 100 |
| Orkney              | 990   | 21349      | 507                        | 51  | 16142      | 76%  | 0                        | 0   | 0          | 0   |
| Shetland            | 1467  | 23154      | 0                          | 0   | 0          | 0%   | 0                        | 0   | 0          | 0   |
| Tayside             | 7527  | 409481     | 7527                       | 100 | 409481     | 100% | 7527                     | 100 | 409481     | 100 |
| Western Isles       | 3060  | 28396      | 825                        | 27  | 16513      | 58%  | 0                        | 0   | 0          | 0   |

Table 9. 60 minute accessibility by helicopter: Population and areal coverage, by Scottish urban/rural classification category

| Scottish Urban Rural Category  | Area  | Population | Intermediate Critical Care |     |            |     | Definitive Critical Care |     |            |     |
|--------------------------------|-------|------------|----------------------------|-----|------------|-----|--------------------------|-----|------------|-----|
|                                |       |            | area                       |     | Population |     | Area                     |     | Population |     |
| Name                           | Km2   | n          | km2                        | %   | n          | %   | km2                      | %   | n          | %   |
| <b>Large urban areas</b>       | 505   | 1792214    | 505                        | 100 | 1792214    | 100 | 505                      | 100 | 1792214    | 100 |
| <b>Other urban areas</b>       | 691   | 1780740    | 691                        | 100 | 1780740    | 100 | 678                      | 98  | 1771127    | 99  |
| <b>Accessible small towns</b>  | 188   | 451419     | 188                        | 100 | 451419     | 100 | 188                      | 100 | 451419     | 100 |
| <b>Remote small towns</b>      | 54    | 105997     | 54                         | 100 | 105997     | 100 | 54                       | 100 | 105997     | 100 |
| <b>Very remote small towns</b> | 45    | 62959      | 40                         | 88  | 56479      | 90  | 16                       | 36  | 29472      | 47  |
| <b>Accessible rural areas</b>  | 18558 | 748324     | 18558                      | 100 | 748324     | 100 | 18281                    | 99  | 745071     | 100 |
| <b>Remote rural areas</b>      | 17828 | 184698     | 17828                      | 100 | 184698     | 100 | 17444                    | 98  | 180785     | 98  |
| <b>Very remote rural areas</b> | 40066 | 176503     | 32272                      | 81  | 128920     | 73  | 24485                    | 61  | 83781      | 47  |
